# Supplementary material
Source: MDPI journal article supplement (https://www.mdpi.com/1999-4907/6/8/2655)
Supplement: s1 [file s1]

Supplementary Materials

HOUSEHOLD SURVEY

The aim of this questionnaire is to collect data for my doctoral studies and the information collected will be confidential and used strictly for academic purpose. This study has no political implication and I will be grateful to learn from you.

Thanks for giving in your time.

Date of interview………………………..

Name of village………………………….

**Description of Household**

1. Name of household head/Respondent
2. Sex: Male……….. Female…………

Male (1), Female (2)

1. Age of household head…………………………………
2. Marital status……………………….
3. Household size……………………...
4. Ethnicity…………………………….
5. How long have you been living in this village (years)……………………………
6. Important areas of household expenditures during 2013/2014……………………

………………………………………………………………………………..

1. Level of education

(1) Illiterate……………………………..

(2) Literate…………………………

LAND AND LAND TENURE ISSUES

1. How many parcels of land do you own………………………………………
2. How many hectares…………………………………………………………..
3. When was the farm first establish (years)……………………………………
4. Form of access to land

(1) Inheritance/customary free hold

(2) Borrower

(3) Others, please specify………………………………………………….

1. What is your perception about land and tree ownership……………………

CROP PRODUCTION SYSTEM

1. Types of crops cultivated………………………………………………………….

Sorghum………Sesame…………Millet……………Maize…………….Cotton…………

Rice………….Beans……………Groundnut………………Others……………..

1. Area (ha) of each crop cultivated………………………………………………………

Sorghum……….Sesame………….Millet…………….Maize………….Cotton……..

Rice……………Beans……………Groundnut……………..

1. Estimated quantities produced in 2013/2014 (kg)…………………………………………….

Sorghum………Sesame………Millet…………..Maize…………..Cotton…………...

Rice…………Beans……………Groundnut………………..

1. Estimated quantity of crop sold during the year 2013/2014………………………………….

LIVESTOCK PRODUCTION SYSTEMS

1. Do you own livestock……………………………………………..
2. Types of livestock and number. Cattle………..Donkey……….. Sheep……………… Goat……….. Others…………………………………….
3. Source of fodder for livestock. Crop residue………………..forest……………farm……

Buys fodder………………from other farms……………………………..

1. Have the number of livestock increase or decrease during the last ten years and why?....... ...............................................................................................................................................
2. Do you perceive sufficiency or insufficiency in fodder……………………

Sufficiency…………………Insufficiency…………………………..

TREE PRODUCTION SYSTEMS

1. Which of the following trees have you planted/currently managing on your farms?
   *Adansonia digitata*………………….*Anacardium occidentale*………..…………
   *Azadirachta* *indica*………………....*Eucalyptus camaldulensis*…………………...
   *Mangifera indica*………… *Moringa oleifera*………………..
2. Please estimate the number of trees you planted/currently managed by your
   *Adansonia digitata*………………….*Anacardium occidentale*………..…………
   *Azadirachta* *indica*………………....*Eucalyptus camaldulensis*…………………...
   *Mangifera indica*………… *Moringa oleifera*………………..
3. List the tree species you preferred that are not available to you?...............................................

………………………………………………………………………………………………....

1. Could you mention what motivated you to plant any of the selected species? Multiple reasons are allowed for each species: Economic…………….Building material…………….
   Fuel wood……………Incentives……………….Access to markets………….Support for tree planting…………………Environmental……………For land security………………Low labor requirements………………………………..
2. What are your reasons for not planting any of the selected species? Land is not sufficient…..

Lack of seedlings/higher prices for seedlings….…………………...…
prefers agriculture to tree planting…………Not profitable (low prices)……………
Lack of markets……………….Longer rotation period………………
Health problem…………….No time/labor……………Land not suitable…………….
Lack management knowledge of trees……………………………
New comer in the village……………..Lack tenure security to land and trees…………………..

1. Indicate previous or planned use of income derived from each of the species in the following categories: daily consumption (1), anticipated expenditures (2), and unexpected expenditures (3). *Adansonia digitata* (1)………(2)………(3)……...*Anacardium occidentale* (1)………(2)..………(3)…….. *Azadirachta* *indica* (1)………(2)………(3)…......
   *Eucalyptus camaldulensis* (1)………(2)………(3)…...*Mangifera indica* (1)………(2)…...…(3)………. *Moringa oleifera* (1)………(2)………..(3)…………..
2. Do you belong to a farmers’ group? Yes……………No……………….
3. Are you a member of the forest management group (FMG)? Yes...................No.....................
4. Willingness to plant each of the six species? Yes……………No……………..

HOUSEHOLD ENERGY

1. Type of household energy. Wood……………kerosene…………..gas……………

Crop residue……………charcoal……………..others…………………..

1. Source of wood energy. Forest………………farm……………..fallow land………

Other farms…………….buys………………………..

1. Has the distance for the energy source change in the last five years?

(0) No………

1. Yes…….
2. If yes to Q.35, give reasons……………………………………………
3. Lack of trees on farm……………………………………….
4. High demand for wood leading to deforestation……………
5. Population growth………………………………………….
6. Others, specify………………………………………………
7. Who collects fuel wood? Male……………Female…………..Both…………….
8. Estimated quantity in bundle per month………………………………………..
9. How much time is spent collecting fuel wood………………………………….
10. How much time was spent 5 and 10 years ago………………………………….
11. Which tree species are mostly collected for household energy………………….

© 2015 by the authors; licensee MDPI, Basel, Switzerland. This article is an open access article distributed under the terms and conditions of the Creative Commons Attribution license (http://creativecommons.org/licenses/by/4.0/).
